1 **Title: Anxiety disorders and age-related changes in physiology**

2

3 **Short title:** Physiological changes in anxiety disorders

4

5 **Authors:** Julian Mutz<sup>1\*</sup>, Thole H. Hoppen<sup>2</sup>, Chiara Fabbri<sup>1,3</sup> and Cathryn M. Lewis<sup>1,4</sup>

6

7 **Affiliations:**

8 1. Social, Genetic and Developmental Psychiatry Centre, Institute of Psychiatry, Psychology &  
9 Neuroscience, King's College London, London, United Kingdom.

10 2. Institute of Psychology, University of Münster, Münster, Germany.

11 3. Department of Biomedical and Neuromotor Sciences, University of Bologna, Bologna, Italy.

12 4. Department of Medical and Molecular Genetics, Faculty of Life Sciences & Medicine, King's  
13 College London, London, United Kingdom.

14

15 **\*Corresponding author:**

16 Julian Mutz; Social, Genetic and Developmental Psychiatry Centre, Institute of Psychiatry,

17 Psychology & Neuroscience, King's College London, Memory Lane, London SE5 8AF, United

18 Kingdom. Email: [julian.mutz@gmail.com](mailto:julian.mutz@gmail.com).

## 19 **Abstract**

20 **Background:** Anxiety disorders are leading contributors to the global disease burden, highly prevalent  
21 across the lifespan, and associated with substantially increased morbidity and early mortality.

22 **Aims:** The aim of this study was to examine age-related changes across a wide range of physiological  
23 measures in middle-aged and older adults with a lifetime history of anxiety disorders compared to  
24 healthy controls.

25 **Method:** The UK Biobank study recruited >500,000 adults, aged 37–73, between 2006–2010. We used  
26 generalised additive models to estimate non-linear associations between age and hand-grip strength,  
27 cardiovascular function, body composition, lung function and heel bone mineral density in cases and in  
28 controls.

29 **Results:** The main dataset included 332,078 adults (mean age = 56.37 years; 52.65% females). In both  
30 sexes, individuals with anxiety disorders had a lower hand-grip strength and blood pressure, while their  
31 pulse rate and body composition measures were higher than in healthy controls. Case-control  
32 differences were larger when considering individuals with chronic and/or severe anxiety disorders, and  
33 differences in body composition were modulated by depression comorbidity status. Differences in age-  
34 related physiological changes between female anxiety disorder cases and healthy controls were most  
35 evident for blood pressure, pulse rate and body composition, while in males for hand-grip strength,  
36 blood pressure and body composition. Most differences in physiological measures between cases and  
37 controls decreased with increasing age.

38 **Conclusions:** Individuals with a lifetime history of anxiety disorders differed from healthy controls  
39 across multiple physiological measures, with some evidence of case-control differences by age. The  
40 differences observed varied by chronicity/severity and depression comorbidity.

41

42 **Keywords:** Ageing; Anxiety; Body composition; Cardiovascular function; Physiology

## 43 **Introduction**

44

45 Anxiety disorders are leading contributors to the global disease burden, highly prevalent across the  
46 lifespan and across nations, and associated with substantially increased morbidity and early mortality(1-  
47 4). A population-based study from Denmark reported that individuals with anxiety disorders had a 39%  
48 higher risk of premature death than the general population(5). This excess mortality does not result only  
49 from unnatural causes of death such as suicide, but also from increased rates of dementia, cardiovascular  
50 disease and other illnesses. Anxiety disorders are also associated with accelerated biological ageing,  
51 including earlier neurodegeneration(6, 7) and telomere attrition(8, 9), and an increased risk of disability  
52 in old age, especially in individuals with comorbid depression(10, 11). Less is known about  
53 physiological differences between individuals with anxiety disorders and healthy controls, and whether  
54 such differences vary by age. A Dutch longitudinal study reported that individuals with anxiety  
55 disorders had poorer lung function than healthy controls, and that men with anxiety disorders showed  
56 a greater decline in lung function over time(12). Women with anxiety disorders also had a lower hand-  
57 grip strength. More severe anxiety disorders were associated with greater physiological abnormalities.  
58 Most studies of physiology in anxiety disorders have focussed on one or two physiological  
59 measures(12-14) and research examining a range of physiological measures is lacking. To the best of  
60 our knowledge, this is the first study to examine age-related changes across a wide range of  
61 physiological measures in middle-aged and older adults with anxiety disorders. Most physiological  
62 measures can be assessed non-invasively, fast and at low cost, while providing reliable information on  
63 functional decline. Importantly, variation in physiological functioning predicts morbidity and mortality.  
64 A greater understanding of age-related physiological changes in anxiety disorders may inform strategies  
65 for prevention and intervention to foster healthy ageing.

66

### 67 **Aims**

68 The aim of this cross-sectional study was to examine associations between age and 15 physiological  
69 markers in individuals with a lifetime history of anxiety disorders compared to healthy controls. Since  
70 the epidemiology of anxiety disorders(2) and human physiology(15) differ by sex, we conducted  
71 separate analyses in males and females. Given that a dose-response relationship between anxiety  
72 disorder severity and differences in physiology has been reported before(12), we also examined chronic  
73 and/or severe anxiety disorders. Finally, depression has been associated with age-related changes in  
74 physiology(16) and is highly comorbid with anxiety disorders(2-4, 12), hence we also examined  
75 individuals with anxiety disorders without comorbid depression.

76

## 77 **Method**

78

### 79 **Study population**

80 The UK Biobank is a prospective study of >500,000 adults aged 37–73 at baseline, recruited between  
81 2006–2010. The study rationale and design have been described elsewhere(17). Briefly, individuals  
82 registered with the UK National Health Service (NHS) and living within a ~40 km radius of one of 22  
83 assessment centres were invited to participate. Participants provided information on their  
84 sociodemographic characteristics, lifestyle and medical history and underwent physical examination.  
85 Hospital inpatient records are available for most participants and primary care records are currently  
86 available for half of participants. A subset of 157,366 out of 339,092 invited participants (46%)  
87 completed an online follow-up mental health questionnaire (MHQ) between 2016 and 2017, covering  
88 31% of all participants.

89

### 90 **Exposures**

91 Age at the baseline assessment was the primary explanatory variable.

92

93 Details of the definition of cases and healthy controls are presented in [Supplement 1](#). Briefly, we used  
94 a transdiagnostic phenotype for lifetime anxiety disorders and identified cases from multiple sources:  
95 the generalised anxiety disorder module of the Composite International Diagnostic Interview Short  
96 Form (CIDI-SF) ([Supplement 2](#))(18) and the Generalised Anxiety Disorder Assessment (GAD-7)(19),  
97 which were assessed through the MHQ; psychiatric diagnoses reported during the nurse-led interview  
98 at baseline or in the MHQ; hospital inpatient records ([Supplement 3](#)); primary care records(20)  
99 ([Supplement 4](#)). We excluded individuals with bipolar disorder or psychosis, as these disorders are  
100 strongly associated with the risk of physical multimorbidity(21, 22). Healthy controls had no anxiety  
101 disorders, reported no current psychotropic medication use at baseline ([Supplement 5](#))(23) and had no  
102 other mental disorders: no psychiatric diagnosis according to the nurse-led interview, MHQ, hospital  
103 inpatient or primary care records; no probable mood disorder(24) ([Supplement 6](#)); no Patient Health  
104 Questionnaire-9 (PHQ-9) sum score of  $\geq 5$ ; no GAD-7 sum score of  $\geq 5$ ; did not report ever feeling  
105 worried, tense, or anxious for most of a month or longer; no depression or bipolar disorder based on the  
106 CIDI-SF depression module and questions on (hypo)manic symptoms(16, 25).

107

### 108 **Physiological measures**

109 We examined 15 physiological measures obtained at the baseline assessment, including maximal hand-  
110 grip strength, systolic and diastolic blood pressure, pulse rate, body mass index (BMI), waist-hip ratio,  
111 fat mass, fat-free mass, body fat percentage, peak expiratory flow, forced vital capacity (FVC), forced  
112 expiratory volume in one second (FEV<sub>1</sub>), FVC/FEV<sub>1</sub> ratio, heel bone mineral density and arterial

113 stiffness. Details of these measures have previously been reported in our study on age-related  
114 physiological changes in depression(16) and are presented in [Supplement 7](#).

115

### 116 **Exclusion criteria**

117 Participants whose genetic and self-reported sex did not match and participants with missing data,  
118 including “do not know” or “prefer not to answer”, for any covariates were excluded.

119

### 120 **Covariates**

121 Covariates were identified from previous studies and included ethnicity, highest  
122 educational/professional qualification(26), physical activity (walking, moderate and vigorous-intensity  
123 activity), smoking status, alcohol intake frequency, sleep duration and, for cardiovascular measures,  
124 antihypertensive medication use (fields 6153 and 6177). Details of the sociodemographic and lifestyle  
125 factors are available in our previous publication(27).

126

### 127 **Statistical analyses**

128 Analyses were prespecified prior to inspection of the data (preregistration: [osf.io/hqu2f](https://osf.io/hqu2f)) and algorithms  
129 were tested on simulated data. Statistical analyses were conducted using R (version 3.6.0).

130

131 Sample characteristics were summarised using means and standard deviations or counts and  
132 percentages. Case-control differences were estimated using standardised mean differences ( $\pm$  95%  
133 confidence intervals).

134

135 We examined the relationship between each physiological measure and age using generalised additive  
136 models (GAMs) with the ‘mgcv’ package in R(28). GAMs are flexible modelling approaches that allow  
137 for the relationship between an outcome variable and a continuous exposure to be represented by a non-  
138 linear smooth curve while adjusting for covariates. This approach is useful if a linear model does not  
139 capture key aspects of the relationship between variables and attempts to achieve maximum goodness-  
140 of-fit while maintaining parsimony of the fitted curve to minimize overfitting. Smoothing parameters  
141 were selected using the restricted maximum likelihood method and we used the default option of ten  
142 basis functions to represent smooth terms. Each measure was modelled against a penalised regression  
143 spline function of age with separate smooths for anxiety disorder cases and healthy controls.

144

145 Two models were fitted for each physiological measure in males and females separately:

146

- 147 • Unadjusted model: physiological measure  $\sim$  anxiety disorder + s(age, by anxiety disorder).
- 148 • Adjusted model: physiological measure  $\sim$  anxiety disorder + s(age, by anxiety disorder) +  
149 covariates (see previous paragraph).

150

151 where  $s(\text{age, by anxiety disorder})$  represents the smooth function for age, stratified by anxiety disorder  
152 status.

153

154 To formally test whether the relationships between physiological measures and age differed between  
155 anxiety disorder cases and controls, we also fitted models that included reference smooths for healthy  
156 controls and difference smooths for anxiety disorder cases compared to healthy controls. For these  
157 analyses, anxiety disorder status was coded as an ordered factor in R. If the difference smooth differs  
158 from zero, the physiological measure follows a different trend with age in anxiety disorder cases and  
159 healthy controls.

160

161 Adjusted  $p$ -values were calculated using the  $p.adjust$  function in R to account for multiple testing across  
162 each set of analyses of the 15 physiological measures. Two methods were used: (1) Bonferroni and (2)  
163 Benjamini & Hochberg(29), two-tailed with  $\alpha = .05$  and false discovery rate of 5%, respectively. We  
164 have opted for this approach because the standard Bonferroni correction is usually too conservative,  
165 potentially leading to a high number of false negatives.

166

167 In a secondary analysis, we examined individuals with chronic and/or severe anxiety disorders, defined  
168 as individuals with (i) a hospital inpatient record of anxiety disorders as the primary diagnosis, (ii)  
169 recurrent or chronic anxiety (E2004 or E2005) in their primary care record or (iii) generalised anxiety  
170 disorder according to the CIDI-SF with maximum level of impairment (“Impact on normal roles during  
171 worst period of anxiety” (field 20418) = A lot) and duration (“Longest period spent worried or  
172 anxious” (field 20420) = All my life / as long as I can remember or at least 24 months).

173

174 In a sensitivity analysis, we excluded individuals with depression comorbidity from anxiety disorder  
175 cases(16).

176

177 We conducted two additional sensitivity analyses that were not pre-registered: (i) we additionally  
178 adjusted analyses of cardiovascular measures for BMI and (ii) we excluded anxiety disorder cases who  
179 reported current use of antidepressants at baseline from the analyses of blood pressure.

## 180 Results

181

### 182 Study population

183 A subset of 444,690 (88.49%) participants had complete data on all covariates. After excluding  
184 participants with missing physiological data, unclear anxiety disorder status ( $n = 93$ ) or not meeting  
185 our inclusion criteria, we retained 332,078 participants in the main dataset. Subsets of 123,597, 228,321  
186 and 107,958 participants were included in the analyses of lung function, heel bone mineral density and  
187 arterial stiffness, respectively (Supplement Figure 1).

### 188 Sample characteristics

189 The average participant age in our main dataset was 56.37 years (SD = 8.11) and 52.65% of  
190 participants were female. Overall, 44,722 (13.47%) participants in this sample had a lifetime history of  
191 anxiety disorders, 65.92% ( $n = 29,482$ ) of whom were female. Descriptive statistics for the full UK  
192 Biobank and for the analytical samples stratified by sex and anxiety disorder status are presented in  
193 Table 1 (physiological measures) and Supplement Table 4 (covariates).

**Table 1.** Physiological measures

|                             | Overall<br>( $N=502,521$ ) |         | Female                             |                                    | Male                               |                                    |
|-----------------------------|----------------------------|---------|------------------------------------|------------------------------------|------------------------------------|------------------------------------|
|                             |                            |         | Healthy control<br>( $N=145,364$ ) | Anxiety disorder<br>( $N=29,482$ ) | Healthy control<br>( $N=141,992$ ) | Anxiety disorder<br>( $N=15,240$ ) |
|                             | Mean (SD)                  | Missing | Mean (SD)                          | Mean (SD)                          | Mean (SD)                          | Mean (SD)                          |
| Hand-grip strength          | 31.77 (11.34)              | 3203    | 24.89 (6.48)                       | 24.68 (6.64)                       | 41.25 (9.11)                       | 40.53 (9.22)                       |
| Systolic blood pressure     | 137.87 (18.65)             | 1325    | 135.71 (19.32)                     | 133.23 (18.48)                     | 141.28 (17.42)                     | 139.63 (16.92)                     |
| Diastolic blood pressure    | 82.26 (10.15)              | 1323    | 80.70 (9.96)                       | 80.29 (9.91)                       | 84.22 (9.96)                       | 83.92 (9.93)                       |
| Pulse rate                  | 69.42 (11.26)              | 1323    | 69.87 (10.40)                      | 70.33 (10.68)                      | 67.76 (11.60)                      | 68.66 (12.04)                      |
| Body mass index             | 27.43 (4.80)               | 3105    | 26.66 (4.85)                       | 26.89 (5.20)                       | 27.64 (4.02)                       | 27.76 (4.33)                       |
| Body fat percentage         | 31.45 (8.55)               | 10408   | 36.06 (6.74)                       | 36.40 (6.96)                       | 24.97 (5.63)                       | 25.27 (5.81)                       |
| Fat mass                    | 24.86 (9.57)               | 10973   | 26.14 (9.50)                       | 26.83 (10.23)                      | 21.87 (7.88)                       | 22.37 (8.48)                       |
| Fat-free mass               | 53.22 (11.50)              | 10176   | 44.33 (4.84)                       | 44.62 (5.05)                       | 63.67 (7.62)                       | 63.80 (7.89)                       |
| Waist-hip ratio             | 0.87 (0.09)                | 2265    | 0.81 (0.07)                        | 0.82 (0.07)                        | 0.93 (0.06)                        | 0.94 (0.06)                        |
|                             |                            |         | $N=50,729$                         | $N=10,128$                         | $N=56,695$                         | $N=6,045$                          |
| Peak expiratory flow        | 407.82 (130.78)            | 168566  | 352.52 (76.81)                     | 356.88 (77.84)                     | 510.07 (115.61)                    | 509.72 (115.63)                    |
| Forced expiratory volume 1s | 2.85 (0.78)                | 149197  | 2.48 (0.53)                        | 2.51 (0.53)                        | 3.43 (0.74)                        | 3.44 (0.74)                        |
| Forced vital capacity       | 3.78 (0.98)                | 149197  | 3.25 (0.64)                        | 3.30 (0.65)                        | 4.57 (0.88)                        | 4.58 (0.89)                        |
| FEV <sub>1</sub> / FVC      | 0.75 (0.07)                | 149197  | 0.76 (0.06)                        | 0.76 (0.06)                        | 0.75 (0.07)                        | 0.75 (0.07)                        |
|                             |                            |         | $N=101,279$                        | $N=19,217$                         | $N=97,749$                         | $N=10,076$                         |
| Heel bone mineral density   | 0.54 (0.14)                | 180831  | 0.52 (0.12)                        | 0.52 (0.12)                        | 0.58 (0.15)                        | 0.57 (0.15)                        |
|                             |                            |         | $N=45,320$                         | $N=10,630$                         | $N=46,549$                         | $N=5,459$                          |
| Arterial stiffness          | 9.34 (4.05)                | 332721  | 8.72 (4.27)                        | 8.71 (3.33)                        | 9.94 (4.59)                        | 9.94 (2.92)                        |

Note: SD = standard deviation; FEV<sub>1</sub> = forced expiratory volume in one second; FVC = forced vital capacity.

### 194 Case-control differences

195 Case-control differences by sex are presented in Table 2. Females with anxiety disorders had a lower  
196 hand-grip strength and blood pressure than healthy controls. Their pulse rate was elevated, and they had  
197 higher values for all body composition measures and most lung function measures than controls. We  
198 did not find evidence of differences in the FEV<sub>1</sub>/FVC ratio, heel bone mineral density or arterial

199 stiffness. Male anxiety disorder cases had a lower hand-grip strength, blood pressure and heel bone  
200 mineral density than healthy controls. Their pulse rate and all body composition measures were higher  
201 than in controls, although the difference in fat-free mass did not survive multiple testing correction. We  
202 did not find evidence of differences in lung function or arterial stiffness in males. The largest case-  
203 control difference was observed for systolic blood pressure (SMD = -0.129, 95% CI -0.142 to -0.117,  
204  $p_{\text{Bonf.}} < 0.001$  in females and SMD = -0.091, 95% CI -0.111 to -0.078,  $p_{\text{Bonf.}} = 0.013$  in males).

**Table 2.** Differences in physiological measures between individuals with anxiety disorders and healthy controls

| Variable                    | Female |        |        |                    |                 | Male   |        |        |                    |                 |
|-----------------------------|--------|--------|--------|--------------------|-----------------|--------|--------|--------|--------------------|-----------------|
|                             | SMD    | 95% CI |        | $p_{\text{Bonf.}}$ | $p_{\text{BH}}$ | SMD    | 95% CI |        | $p_{\text{Bonf.}}$ | $p_{\text{BH}}$ |
| Hand-grip strength          | -0.032 | -0.044 | -0.019 | <0.001             | <0.001          | -0.079 | -0.096 | -0.062 | <0.001             | <0.001          |
| Systolic blood pressure     | -0.129 | -0.142 | -0.117 | <0.001             | <0.001          | -0.095 | -0.111 | -0.078 | <0.001             | <0.001          |
| Diastolic blood pressure    | -0.041 | -0.053 | -0.028 | <0.001             | <0.001          | -0.030 | -0.046 | -0.013 | 0.007              | 0.001           |
| Pulse rate                  | 0.045  | 0.032  | 0.057  | <0.001             | <0.001          | 0.078  | 0.061  | 0.095  | <0.001             | <0.001          |
| Body mass index             | 0.047  | 0.035  | 0.060  | <0.001             | <0.001          | 0.029  | 0.013  | 0.046  | 0.017              | 0.002           |
| Body fat percentage         | 0.050  | 0.038  | 0.063  | <0.001             | <0.001          | 0.054  | 0.037  | 0.070  | <0.001             | <0.001          |
| Fat mass                    | 0.071  | 0.059  | 0.084  | <0.001             | <0.001          | 0.063  | 0.046  | 0.080  | <0.001             | <0.001          |
| Fat-free mass               | 0.058  | 0.046  | 0.071  | <0.001             | <0.001          | 0.017  | 0.000  | 0.034  | 0.831              | 0.083           |
| Waist-hip ratio             | 0.044  | 0.031  | 0.056  | <0.001             | <0.001          | 0.091  | 0.074  | 0.107  | <0.001             | <0.001          |
| Peak expiratory flow        | 0.057  | 0.035  | 0.078  | <0.001             | <0.001          | -0.003 | -0.029 | 0.024  | >0.999             | 0.886           |
| Forced expiratory volume 1s | 0.064  | 0.042  | 0.085  | <0.001             | <0.001          | 0.010  | -0.017 | 0.036  | >0.999             | 0.582           |
| Forced vital capacity       | 0.067  | 0.045  | 0.088  | <0.001             | <0.001          | 0.013  | -0.013 | 0.040  | >0.999             | 0.442           |
| FEV <sub>1</sub> / FVC      | 0.011  | -0.010 | 0.033  | >0.999             | 0.347           | -0.005 | -0.031 | 0.022  | >0.999             | 0.844           |
| Heel bone mineral density   | -0.005 | -0.021 | 0.010  | >0.999             | 0.538           | -0.067 | -0.088 | -0.047 | <0.001             | <0.001          |
| Arterial stiffness          | -0.003 | -0.025 | 0.018  | >0.999             | 0.712           | -0.001 | -0.029 | 0.027  | >0.999             | 0.927           |

Note: SMD = standardised mean difference; CI = confidence interval; Bonf. = Bonferroni; BH = Benjamini & Hochberg; FEV<sub>1</sub> = forced expiratory volume in one second; FVC = forced vital capacity. *P*-values for Welch's t-test. Negative values correspond to lower values in anxiety disorder cases.

### 205 *Chronic and/or severe anxiety*

206 Between 8.37% to 9.46% of female and 9.47% to 9.99% of male cases had chronic and/or severe anxiety  
207 disorders ([Supplement Table 5](#)). In females, we observed the same overall pattern of results as in the  
208 main analysis, although all observed differences were larger in magnitude. For example, the case-  
209 control difference in body fat percentage was SMD = 0.113 (95% CI 0.074-0.151,  $p_{\text{Bonf.}} < 0.001$ )  
210 ([Supplement Table 6](#)), compared to SMD = 0.050 (95% CI 0.038-0.063,  $p_{\text{Bonf.}} < 0.001$ ) in the main  
211 analysis. In male chronic and/or severe cases, we did not find evidence of a difference in diastolic blood  
212 pressure compared to healthy controls (SMD = -0.013, 95% CI -0.064 to 0.038,  $p_{\text{BH}} = 0.713$ ) and the  
213 difference in body fat percentage was not statistically significant after multiple testing correction. For  
214 most other physiological measures, we observed larger case-control differences than in the main  
215 analysis ([Supplement Table 6](#)). For example, the case-control difference in systolic blood pressure was  
216 SMD = -0.095 (95% CI -0.111 to -0.078,  $p_{\text{Bonf.}} < 0.001$ ) in the main analysis and SMD = -0.153  
217 (95% CI -0.204 to -0.102,  $p_{\text{Bonf.}} < 0.001$ ) in this analysis.

218

### 219 *Anxiety without depression comorbidity*

220 After excluding anxiety disorder cases with depression comorbidity, we retained between 25.91% to  
221 37.67% of female and 31.45% to 44.69% of male cases ([Supplementary Table 5](#)). In females,



222 differences in hand-grip strength, blood pressure, pulse rate and arterial stiffness remained statistically  
223 significant but were smaller in magnitude than in the main analysis ([Supplement Table 7](#)). Body mass  
224 index, fat mass and fat-free mass, which were higher in cases than in controls in the main analysis, were  
225 lower in cases without depression comorbidity (SMDs between -0.026 and -0.049). We did not find  
226 evidence of case-control differences in body fat percentage or waist-hip ratio in this analysis. There was  
227 also no longer evidence of differences in lung function, except that the FEV<sub>1</sub>/FVC ratio was lower in  
228 cases than in controls (SMD = -0.048, 95% CI -0.082 to -0.013,  $p_{BH} = 0.019$ ). Finally, heel bone  
229 mineral density was lower in female cases (SMD = -0.036, 95% CI -0.060 to -0.012,  $p_{Bonf.} = 0.043$ ).  
230 In males, differences in hand-grip strength, blood pressure, pulse rate, waist-hip ratio, lung function,  
231 heel bone mineral density and arterial stiffness were similar to the main analysis. Body mass index and  
232 fat-free mass were lower in cases than in controls (SMD = -0.058, 95% CI -0.084 to -0.033,  $p_{Bonf.} <$   
233  $0.001$  and SMD = -0.066, 95% CI -0.092 to -0.041,  $p_{Bonf.} < 0.001$ , respectively) and we did not find  
234 evidence of case-control differences in body fat percentage or fat mass, which were elevated in cases  
235 in the main analysis.

236

### 237 **Case-control differences by age**

238 We found some evidence that age-related changes in blood pressure, pulse rate, body composition and  
239 heel bone mineral density differed between female cases and controls ([Figure 1](#)). Systolic blood  
240 pressure was -0.9 mmHg lower in cases at age 45 and this difference widened to -2.2 mmHg at age 65.  
241 For diastolic blood pressure, we did not find evidence of case-control differences below age 52, and  
242 slightly lower diastolic blood pressure in cases than in controls above age 52. Case-control differences  
243 in pulse rate and body composition narrowed with age ([Supplement Figure 2](#)). Heel bone mineral  
244 density was slightly lower in cases than in controls below age 55, and there was no evidence of  
245 differences between older cases and controls.

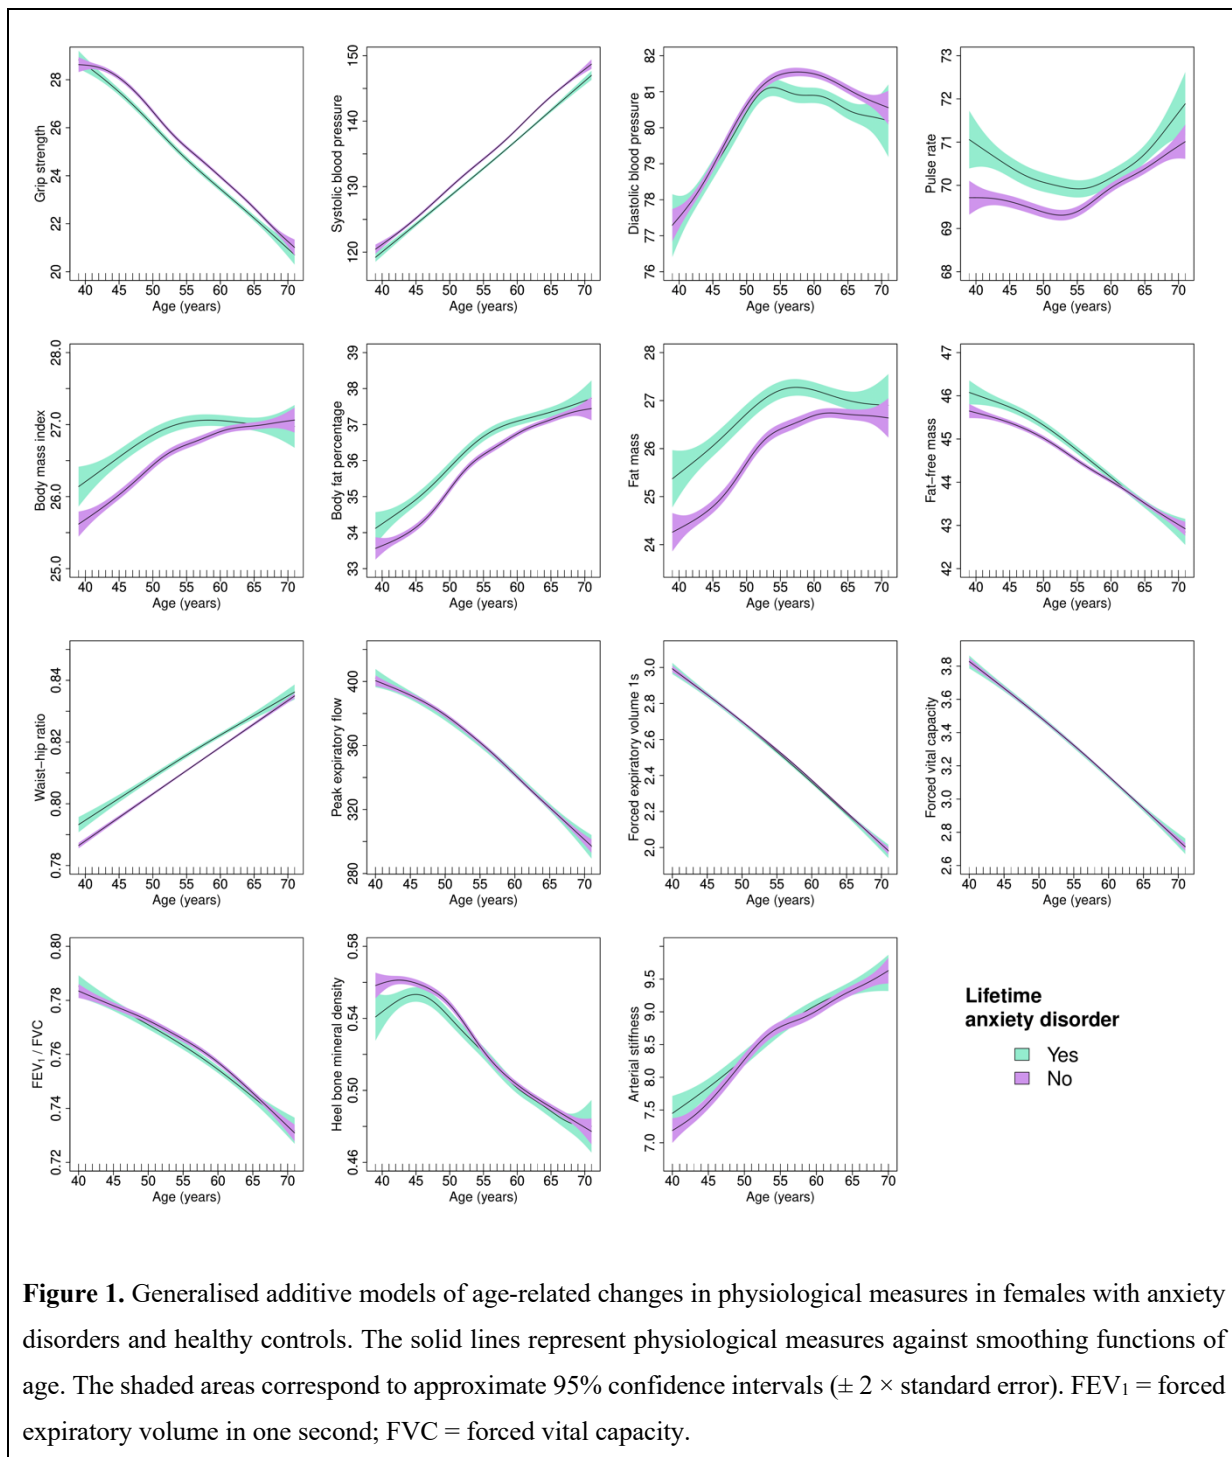

246 In males, case-control differences in hand-grip strength, pulse rate, waist-hip ratio and heel bone  
 247 mineral density narrowed with age (Figure 2 and Supplement Figure 3). There was some evidence  
 248 that diastolic blood pressure was lower in cases than in controls above age 50, although the formal  
 249 statistical test did not survive multiple testing correction. We found little evidence of case-control  
 250 differences by age for the other physiological measures.

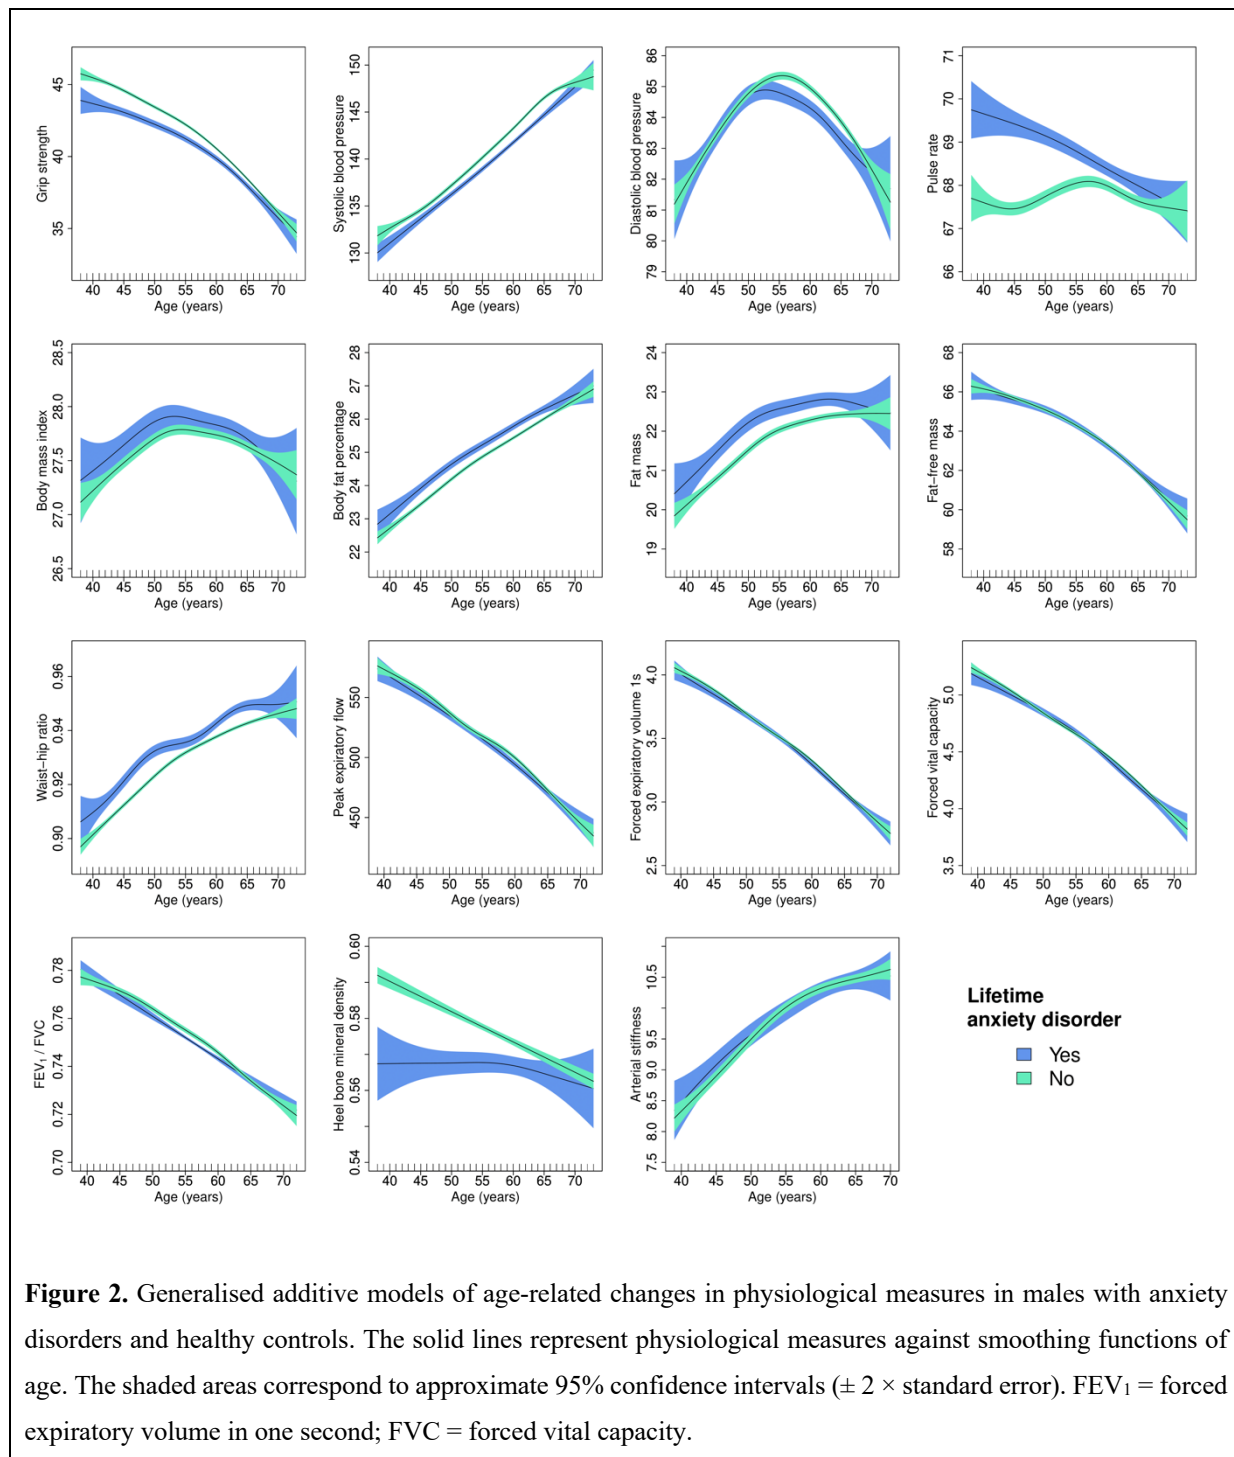

251 In females, we observed similar results across all physiological measures after adjustment for covariates  
 252 (Supplement Figures 4 and 5). The formal statistical tests provided no evidence of case-control  
 253 differences in age-related changes in heel bone mineral density, however, the overall pattern of results  
 254 was comparable to the unadjusted model. In males, we also observed similar results in the adjusted  
 255 model (Supplement Figures 6 and 7). Although the trajectories were similar to the unadjusted analysis,  
 256 the formal statistical tests provided no evidence of case-control differences in age-related changes in

257 waist-hip ratio. The same was true for diastolic blood pressure and heel bone mineral density after  
258 multiple testing correction.

259

#### 260 *Chronic and/or severe anxiety*

261 In female chronic and/or severe cases, we observed similar results for age-related changes in blood  
262 pressure and body composition, except that there was no evidence of case-control differences in fat-  
263 free mass below age 45 ([Supplement Figures 8 and 9](#)). As in the main analysis, we observed no  
264 evidence of case-control differences in age-related changes in lung function or arterial stiffness.  
265 Differences in results were most evident for hand-grip strength and pulse rate, and to a lesser extent for  
266 heel bone mineral density. The formal statistical tests provided some evidence of case-control  
267 differences in age-related changes in blood pressure, body mass index, fat mass and fat-free mass,  
268 although none survived multiple testing correction. For male chronic and/or severe cases, we found  
269 some evidence that case-control differences in hand-grip strength and pulse rate narrowed with age,  
270 similar to the results from the main analysis, although none of the formal statistical tests survived  
271 multiple testing correction. There was less evidence of case-control differences in age-related changes  
272 in systolic blood pressure and no evidence of case-control differences in age-related changes in diastolic  
273 blood pressure. For all other physiology measures, none of the formal statistical tests were statistically  
274 significant ([Supplement Figures 10 and 11](#)).

275

#### 276 *Anxiety without depression comorbidity*

277 In female cases without depression comorbidity, none of the formal statistical tests provided evidence  
278 of case-control differences in age-related changes in physiology. We also observed less evidence of  
279 differences by age in blood pressure or pulse rate. There was some evidence that several body  
280 composition and lung function measures were lower in cases than in controls between ages 45 to 65  
281 ([Supplement Figures 12 and 13](#)). In male cases, the formal statistical test provided some evidence of  
282 case-control differences in age-related changes in pulse rate, although it did not survive multiple testing  
283 correction. None of the other formal statistical tests were statistically significant and there was less  
284 evidence of case-control differences in age-related physiological changes ([Supplement Figures 14 and](#)  
285 [15](#)).

286

#### 287 **Additional sensitivity analyses**

288 Case-control differences in cardiovascular function by age were similar to the results of our main  
289 analysis after additional adjustment for BMI ([Supplement Figures 16 and 17](#)). Excluding anxiety  
290 disorder cases who reported current use of antidepressants ( $n = 6517$  females and  $n = 2700$  males)  
291 had a negligible effect on case-control differences in blood pressure ([Supplement Table 7](#)).

## 292 **Discussion**

293

### 294 **Principal findings**

295 We observed case-control differences in hand-grip strength, blood pressure, pulse rate and body  
296 composition in both sexes, while case-control differences in lung function and heel bone mineral density  
297 were specific to females and males, respectively. We found no evidence of case-control differences in  
298 arterial stiffness.

299

300 Most of the observed differences were larger when we examined chronic and/or severe anxiety  
301 disorders. However, in males, the difference in diastolic blood pressure was smaller and not statistically  
302 significant, and differences in body fat percentage and heel bone mineral density, while similar in  
303 magnitude, were no longer statistically significant.

304

305 After excluding cases with comorbid depression, most differences remained statistically significant but  
306 were smaller in magnitude. However, body composition measures in both sexes were either lower in  
307 cases, or we did not find evidence of case-control differences. We found some evidence that heel bone  
308 mineral density was lower in female cases without comorbid depression. Most case-control differences  
309 in lung function, however, were no longer statistically significant. We also did not find evidence of  
310 case-control differences in diastolic blood pressure in males without comorbid depression.

311

312 Differences in age-related physiological changes between female anxiety disorder cases and healthy  
313 controls were most evident for blood pressure, pulse rate and body composition, with some evidence of  
314 differences in heel bone mineral density. Most case-control differences narrowed with age, except that  
315 we found a larger difference in blood pressure in older participants. In males, case-control differences  
316 in hand-grip strength, pulse rate, and to a lesser extent in waist-hip ratio and heel bone mineral density  
317 narrowed with age. Diastolic blood pressure was lower in older cases than in controls.

318

319 The overall pattern of results was comparable in female chronic and/or severe cases, but there was  
320 generally less evidence of differences between trajectories in males. Except for body composition, there  
321 was limited evidence of case-control differences in age-related physiological changes after excluding  
322 individuals with comorbid depression.

323

### 324 **Findings in context**

325 Consistent with findings from the Netherland Study of Depression and Anxiety (NESDA)(12), female  
326 cases had a lower hand-grip strength. Hand-grip strength was also lower in male cases, which had not  
327 been observed in the NESDA.

328

329 Previous findings regarding anxiety disorders and blood pressure have been mixed and studies have  
330 often examined hypertension instead of blood pressure(30-33). While a recent meta-analysis reported  
331 increased rates of hypertension in anxiety disorders(14), several studies found no statistically significant  
332 associations with hypertension or blood pressure(34-38). Some studies observed lower blood pressure  
333 in anxiety disorders(39-41). Antidepressant medication and benzodiazepine use may affect blood  
334 pressure(42-44), and some population-based studies have observed lower blood pressure in  
335 depression(16, 42). The high degree of comorbidity between anxiety disorders and depression and  
336 differences in medication use might partially explain these mixed results. We observed lower blood  
337 pressure in anxiety disorders, except for diastolic blood pressure in males, irrespective of depressive  
338 comorbidity. Excluding individuals who reported antidepressant use at baseline resulted in a negligible  
339 decrease in the case-control difference in systolic blood pressure and a negligible increase in the  
340 difference in diastolic blood pressure. Case-control differences in blood pressure were larger in chronic  
341 and/or severe anxiety disorders.

342

343 Consistent with previous research(45, 46), we observed a higher pulse rate in anxiety disorder cases.  
344 Noteworthy, reductions in anxiety disorder severity following cognitive behavioural therapy have been  
345 associated with a decrease in resting pulse rate(47).

346

347 Previous research has found higher rates of obesity(48, 49) and poor diet(50) in anxiety disorders,  
348 consistent with our observation that cases had elevated measures of body composition. However, our  
349 analyses suggested that these differences may be modified by depression comorbidity. Depression has  
350 been associated with increased metabolic risk factors(51) and elevated body composition measures(16).  
351 One study found that depression, but not anxiety disorders, was associated with an increased risk of  
352 metabolic syndrome(52), although a large Finnish birth cohort study found no evidence that either  
353 depression or anxiety disorders were associated with metabolic syndrome(53).

354

355 Our lung function results contradict previous research. A cross-sectional analysis of the NESDA found  
356 poorer lung function in females with anxiety disorders and/or depression compared to healthy controls  
357 and better lung function in male cases than in controls(54). A 6-year longitudinal assessment of these  
358 participants suggested a greater decline in lung function in male cases compared to controls(12). We  
359 observed better lung function in female cases and found no statistically significant case-control  
360 differences in males. However, we observed no evidence of differences after excluding individuals with  
361 comorbid depression. Noteworthy, the results from the NESDA were not reported separately for anxiety  
362 disorders and depression.

363

364 Our results confirm previous research(55) that found a lower bone mineral density in male cases and  
365 limited evidence of a case-control difference in females.

366

367 We did not observe any differences in arterial stiffness between cases and controls. This finding is  
368 surprising given that previous studies have reported increased arterial stiffness in anxiety disorders(56,  
369 57).

370

371 Inconsistencies in findings between studies could result from differences in sample characteristics such  
372 as age, sex, severity of symptoms or the prevalence of effect modifiers. Systematic reviews of studies  
373 examining each measure of physiological function in relation to anxiety disorders could address these  
374 important questions. The definition of anxiety disorders, including which specific diagnoses were  
375 included, might also contribute to differences in results.

376

377 To our knowledge, we report the first study of age-related changes in physiology in anxiety disorders  
378 with age as a continuous rather than a categorical variable. Previous studies dichotomised age, for  
379 example testing differences between middle-aged participants and others(14), making comparisons  
380 with our study difficult.

381

### 382 **Mechanisms**

383 Several mechanisms could explain the physiological differences between anxiety disorders cases and  
384 healthy controls. Anxiety disorders are sometimes associated with less healthy lifestyle behaviours(58)  
385 which could affect a range of physiological makers. Physiological differences could also reflect the  
386 cumulative effects of anxiety-related overactivation of the hypothalamic-pituitary-adrenal axis and  
387 sympathetic nervous system(33) as well as increased inflammation and oxidative stress(59-61). It is  
388 also possible that the reciprocal relationship between late-life anxiety and associated cognitive  
389 impairment may be a driver of poor physiological function(62). The greater case-control differences  
390 observed in chronic and/or severe anxiety disorders could be explained by a dose-response relationship  
391 between severity of symptoms and physiology mediated by a greater impact of anxiety on lifestyle,  
392 overactivation of the sympathetic nervous system and other potential pathways. A potential explanation  
393 for the observation that case-control differences decreased with increasing age is that the prevalence of  
394 comorbidities increases with age which may dilute the effects that anxiety disorders may have.

395

### 396 **Limitations**

397 The cross-sectional study design presents uncertainty about whether case-control differences by age  
398 represent changes due to ageing or potential cohort effects. Future work should examine physiological  
399 function in anxiety disorders longitudinally. Although we found that all physiological measures varied  
400 by age, selection bias resulting in healthier older adults participating at higher rates relative to their age

401 group could result in the underestimation of age-related changes. To achieve maximum cohort  
402 coverage, we identified cases from multiple data sources, with strengths and limitations that have been  
403 discussed elsewhere(23, 63, 64). For the primary care records, we included the additional quality control  
404 criterion that cases needed to have at least two mentions of anxiety in their records. Anxiety disorder  
405 cases in this study also included individuals with a single episode. This likely resulted in an  
406 underestimation of case-control differences. A small number of individuals with subthreshold disorders  
407 could be present amongst the healthy controls, which could have attenuated observed differences. We  
408 examined a transdiagnostic definition of anxiety disorders, and differences in physiological function  
409 between specific diagnoses could be explored in future studies. Although we found that the differences  
410 between individuals with chronic and/or severe anxiety disorders and controls were larger, these  
411 differences could at least partly reflect higher levels of comorbidities in addition to the effects of  
412 chronicity and/or severity. Some caution is warranted in interpreting the findings of the sensitivity  
413 analyses due to the smaller sample size and lower statistical power. Finally, limitations in the  
414 assessment of physiological function may have masked some differences between cases and controls.  
415 For example, dynamic measures such as pulse rate were not measured longitudinally, and our study  
416 does therefore not provide insights into potential case-control differences that could be identified from  
417 time-series data. Similarly, lung function was estimated through volumetric measures using breath  
418 spirometry and we could therefore not examine irregularity of respiratory patterns. Physiological  
419 measures with higher temporal resolution could be examined in future studies.

420

### 421 **Generalisability**

422 UK Biobank participants are not fully representative of the UK population. MHQ respondents were  
423 also more educated, of higher socioeconomic status and had fewer long-standing illnesses than  
424 participants who did not complete the MHQ. Similar patterns of disease prevalence were present in the  
425 MHQ and hospital inpatient records, although anxiety was reported more frequently in the MHQ(18).  
426 Nevertheless, the overall number of individuals with a lifetime history of anxiety disorders identified  
427 in our study was comparable to previous epidemiological studies(65). Wider issues of generalisability  
428 of findings from the UK Biobank have been discussed elsewhere(66). Our findings do not generalise to  
429 populations below age 40 or older than age 70, and there was greater uncertainty near the lower and  
430 upper extremes of the age range in this study. Additional studies in younger participants and in the  
431 elderly are needed.

432

### 433 **Implications**

434 Individuals with a lifetime history of anxiety disorders differed from healthy controls across multiple  
435 physiological measures, with some evidence of case-control differences by age. The differences  
436 observed varied by chronicity/severity and depression comorbidity. Monitoring of physiological



437 function in individuals with anxiety disorders should be adapted depending on depression comorbidity  
438 status.

439 **Ethics**

440 We assert that all procedures contributing to this work comply with the ethical standards of the relevant  
441 national and institutional committees on human experimentation. All procedures were approved for the  
442 UK Biobank study by the National Information Governance Board for Health and Social Care and the  
443 NHS North West Multicentre Research Ethics Committee (11/NW/0382). No project-specific ethical  
444 approval is needed. Data access permission has been granted under UK Biobank application 45514.  
445 Written informed consent was obtained from all participants.

446

447 **Declaration of Interest**

448 JM receives studentship funding from the Biotechnology and Biological Sciences Research Council  
449 (BBSRC) and Eli Lilly and Company Limited. CML is a member of the Scientific Advisory Board of  
450 Myriad Neuroscience. CF has been a speaker for Janssen. THH declares no relevant conflict of interest.

451

452 **Funding**

453 JM receives studentship funding from the Biotechnology and Biological Sciences Research Council  
454 (BBSRC) (ref: 2050702) and Eli Lilly and Company Limited. CF was supported by Fondazione  
455 Umberto Veronesi (<https://www.fondazioneveronesi.it>). CML is part-funded by the National Institute  
456 for Health Research (NIHR) Maudsley Biomedical Research Centre at South London and Maudsley  
457 NHS Foundation Trust and King's College London. The views expressed are those of the authors and  
458 not necessarily those of the NHS, the NIHR or the Department of Health and Social Care.

459

460 **Acknowledgments**

461 This research has been conducted using data from UK Biobank, a major biomedical database. This  
462 project made use of time on Rosalind HPC, funded by Guy's & St Thomas' Hospital NHS Trust  
463 Biomedical Research Centre (GSTT-BRC), South London & Maudsley NHS Trust Biomedical  
464 Research Centre (SLAM-BRC), and Faculty of Natural Mathematics & Science (NMS) at King's  
465 College London.

466

467 **Author Contribution**

468 CML acquired the studentship funding, interpreted the findings and critically reviewed the manuscript.  
469 JM conceived the idea of the study, acquired the data, carried out the statistical analysis, interpreted the  
470 findings, wrote the manuscript and revised the manuscript for final submission. THH contributed to the  
471 study design, interpreted the findings and contributed to the writing of the manuscript. CF interpreted  
472 the findings and critically reviewed the manuscript. All authors read and approved the final manuscript.  
473 JM had full access to all data used in this study and takes responsibility for the integrity of the data and  
474 the accuracy of the data analysis.

475

476 **Data Availability**

477 The data used are available to all bona fide researchers for health-related research that is in the public  
478 interest, subject to an application process and approval criteria. Study materials are publicly available  
479 online at <http://www.ukbiobank.ac.uk>.

## 480 References

481

- 482 1. Vos T, Lim SS, Abbafati C, Abbas KM, Abbasi M, Abbasifard M, et al. Global burden of 369  
483 diseases and injuries in 204 countries and territories, 1990–2019: a systematic analysis for the Global  
484 Burden of Disease Study 2019. *The Lancet*. 2020;396(10258):1204-22.
- 485 2. Baxter AJ, Scott K, Vos T, Whiteford H. Global prevalence of anxiety disorders: a systematic  
486 review and meta-regression. *Psychological Medicine*. 2013;43(5):897-910.
- 487 3. Hovenkamp-Hermelink JH, Jeronimus BF, Myroniuk S, Riese H, Schoevers RA. Predictors  
488 of persistence of anxiety disorders across the lifespan: a systematic review. *The Lancet Psychiatry*.  
489 2021;8(5):428-43.
- 490 4. Markkula N, Härkänen T, Perälä J, Partti K, Pena S, Koskinen S, et al. Mortality in people  
491 with depressive, anxiety and alcohol use disorders in Finland. *The British Journal of Psychiatry*.  
492 2012;200(2):143-9.
- 493 5. Meier SM, Mattheisen M, Mors O, Mortensen PB, Laursen TM, Penninx BW. Increased  
494 mortality among people with anxiety disorders: total population study. *The British Journal of*  
495 *Psychiatry*. 2016;209(3):216-21.
- 496 6. Perna G, Iannone G, Alciati A, Caldirola D. Are anxiety disorders associated with accelerated  
497 aging? A focus on neuroprogression. *Neural Plasticity*. 2016;2016.
- 498 7. Karim HT, Ly M, Yu G, Krafty R, Tudorascu DL, Aizenstein HJ, et al. Aging faster: worry  
499 and rumination in late life are associated with greater brain age. *Neurobiology of Aging*. 2021;101:13-  
500 21.
- 501 8. Malouff JM, Schutte NS. A meta-analysis of the relationship between anxiety and telomere  
502 length. *Anxiety, Stress, & Coping*. 2017;30(3):264-72.
- 503 9. Verhoeven JE, Révész D, van Oppen P, Epel ES, Wolkowitz OM, Penninx BW. Anxiety  
504 disorders and accelerated cellular ageing. *The British Journal of Psychiatry*. 2015;206(5):371-8.
- 505 10. Brenes GA, Guralnik JM, Williamson JD, Fried LP, Simpson C, Simonsick EM, et al. The  
506 influence of anxiety on the progression of disability. *Journal of the American Geriatrics Society*.  
507 2005;53(1):34-9.
- 508 11. Brenes GA, Penninx BW, Judd PH, Rockwell E, Sewell DD, Wetherell JL. Anxiety,  
509 depression and disability across the lifespan. *Aging and Mental Health*. 2008;12(1):158-63.
- 510 12. Lever-van Milligen BA, Lamers F, Smit JH, Penninx BW. Six-year trajectory of objective  
511 physical function in persons with depressive and anxiety disorders. *Depression and Anxiety*.  
512 2017;34(2):188-97.
- 513 13. Goodwin RD, Chuang S, Simuro N, Davies M, Pine DS. Association between lung function  
514 and mental health problems among adults in the United States: findings from the First National Health  
515 and Nutrition Examination Survey. *American Journal of Epidemiology*. 2007;165(4):383-8.
- 516 14. Pan Y, Cai W, Cheng Q, Dong W, An T, Yan J. Association between anxiety and  
517 hypertension: a systematic review and meta-analysis of epidemiological studies. *Neuropsychiatric*  
518 *Disease and Treatment*. 2015;11:1121-30.
- 519 15. Austad SN, Bartke A. Sex differences in longevity and in responses to anti-aging  
520 interventions: a mini-review. *Gerontology*. 2016;62(1):40-6.
- 521 16. Mutz J, Lewis CM. Lifetime depression and age-related changes in body composition,  
522 cardiovascular function, grip strength and lung function: sex-specific analyses in the UK Biobank.  
523 *Aging*. 2021;13(13):17038-79.
- 524 17. Bycroft C, Freeman C, Petkova D, Band G, Elliott LT, Sharp K, et al. The UK Biobank  
525 resource with deep phenotyping and genomic data. *Nature*. 2018;562(7726):203-9.
- 526 18. Davis KA, Coleman JR, Adams M, Allen N, Breen G, Cullen B, et al. Mental health in UK  
527 Biobank—development, implementation and results from an online questionnaire completed by 157  
528 366 participants: a reanalysis. *BJPsych Open*. 2020;6(2):E18.
- 529 19. Plummer F, Manea L, Trepel D, McMillan D. Screening for anxiety disorders with the GAD-  
530 7 and GAD-2: a systematic review and diagnostic metaanalysis. *General Hospital Psychiatry*.  
531 2016;39:24-31.

- 532 20. Fabbri C, Hageaars SP, John C, Williams AT, Shrine N, Moles L, et al. Genetic and clinical  
533 characteristics of treatment-resistant depression using primary care records in two UK cohorts.  
534 *Molecular Psychiatry*. 2021.
- 535 21. Stubbs B, Koyanagi A, Veronese N, Vancampfort D, Solmi M, Gaughran F, et al. Physical  
536 multimorbidity and psychosis: comprehensive cross sectional analysis including 242,952 people  
537 across 48 low-and middle-income countries. *BMC Medicine*. 2016;14(1):1-12.
- 538 22. Smith DJ, Martin D, McLean G, Langan J, Guthrie B, Mercer SW. Multimorbidity in bipolar  
539 disorder and undertreatment of cardiovascular disease: a cross sectional study. *BMC Medicine*.  
540 2013;11(1):1-11.
- 541 23. Davis KA, Cullen B, Adams M, Brailean A, Breen G, Coleman JR, et al. Indicators of mental  
542 disorders in UK Biobank—A comparison of approaches. *International Journal of Methods in*  
543 *Psychiatric Research*. 2019;28(3):e1796.
- 544 24. Smith DJ, Nicholl BI, Cullen B, Martin D, Ul-Haq Z, Evans J, et al. Prevalence and  
545 characteristics of probable major depression and bipolar disorder within UK biobank: cross-sectional  
546 study of 172,751 participants. *PloS One*. 2013;8(11):e75362.
- 547 25. Mutz J, Young AH, Lewis CM. Age-related changes in physiology in individuals with bipolar  
548 disorder. *Journal of Affective Disorders*. 2021.
- 549 26. Guggenheim JA, Williams C. Childhood febrile illness and the risk of myopia in UK Biobank  
550 participants. *Eye*. 2016;30(4):608-14.
- 551 27. Mutz J, Roscoe CJ, Lewis CM. Exploring health in the UK Biobank: associations with  
552 sociodemographic characteristics, psychosocial factors, lifestyle and environmental exposures. *BMC*  
553 *Medicine*. 2021;19(1):240.
- 554 28. Wood SN. *Generalized additive models: an introduction with R*: CRC press; 2017.
- 555 29. Benjamini Y, Hochberg Y. Controlling the false discovery rate: a practical and powerful  
556 approach to multiple testing. *Journal of the Royal Statistical Society: Series B (Methodological)*.  
557 1995;57(1):289-300.
- 558 30. Byrd JB, Brook RD. Anxiety in the “age of hypertension”. *Current Hypertension Reports*.  
559 2014;16(10):1-7.
- 560 31. Cuffee Y, Ogedegbe C, Williams NJ, Ogedegbe G, Schoenthaler A. Psychosocial risk factors  
561 for hypertension: an update of the literature. *Current Hypertension Reports*. 2014;16(10):483.
- 562 32. Player MS, Peterson LE. Anxiety disorders, hypertension, and cardiovascular risk: a review.  
563 *The International Journal of Psychiatry in Medicine*. 2011;41(4):365-77.
- 564 33. Cohen BE, Edmondson D, Kronish IM. State of the art review: depression, stress, anxiety,  
565 and cardiovascular disease. *American Journal of Hypertension*. 2015;28(11):1295-302.
- 566 34. Jackson CA, Pathirana T, Gardiner PA. Depression, anxiety and risk of hypertension in mid-  
567 aged women: a prospective longitudinal study. *Journal of Hypertension*. 2016;34(10):1959-66.
- 568 35. Jones-Webb R, Jacobs Jr DR, Flack JM, Liu K. Relationships between depressive symptoms,  
569 anxiety, alcohol consumption, and blood pressure: results from the CARDIA study. *Alcoholism:*  
570 *Clinical and Experimental Research*. 1996;20(3):420-7.
- 571 36. Maatouk I, Herzog W, Böhlen F, Quinzler R, Löwe B, Saum K-U, et al. Association of  
572 hypertension with depression and generalized anxiety symptoms in a large population-based sample  
573 of older adults. *Journal of Hypertension*. 2016;34(9):1711-20.
- 574 37. Shinn EH, Poston WSC, Kimball KT, St. Jeor ST, Foreyt JP. Blood pressure and symptoms  
575 of depression and anxiety: a prospective study. *American Journal of Hypertension*. 2001;14(7):660-4.
- 576 38. Yan LL, Liu K, Matthews KA, Daviglius ML, Ferguson TF, Kiefe CI. Psychosocial factors  
577 and risk of hypertension: the Coronary Artery Risk Development in Young Adults (CARDIA) study.  
578 *JAMA*. 2003;290(16):2138-48.
- 579 39. Huang Y, Su Y, Jiang Y, Zhu M. Sex differences in the associations between blood pressure  
580 and anxiety and depression scores in a middle-aged and elderly population: the Irish Longitudinal  
581 Study on Ageing (TILDA). *Journal of Affective Disorders*. 2020;274:118-25.
- 582 40. Hildrum B, Romild U, Holmen J. Anxiety and depression lowers blood pressure: 22-year  
583 follow-up of the population based HUNT study, Norway. *BMC Public health*. 2011;11(1):1-8.
- 584 41. Bhat SK, Beilin LJ, Robinson M, Burrows S, Mori TA. Relationships between depression and  
585 anxiety symptoms scores and blood pressure in young adults. *Journal of Hypertension*.  
586 2017;35(10):1983-91.

- 587 42. Licht CM, De Geus EJ, Seldenrijk A, Van Hout HP, Zitman FG, Van Dyck R, et al.  
588 Depression is associated with decreased blood pressure, but antidepressant use increases the risk for  
589 hypertension. *Hypertension*. 2009;53(4):631-8.
- 590 43. Zhong Z, Wang L, Wen X, Liu Y, Fan Y, Liu Z. A meta-analysis of effects of selective  
591 serotonin reuptake inhibitors on blood pressure in depression treatment: outcomes from placebo and  
592 serotonin and noradrenaline reuptake inhibitor controlled trials. *Neuropsychiatric Disease and  
593 Treatment*. 2017;13:2781-96.
- 594 44. Mendelson N, Gontmacher B, Vodonos A, Novack V, Abu-Ajaj M, Wolak A, et al.  
595 Benzodiazepine consumption is associated with lower blood pressure in ambulatory blood pressure  
596 monitoring (ABPM): retrospective analysis of 4938 ABPMs. *American Journal of Hypertension*.  
597 2018;31(4):431-7.
- 598 45. Latvala A, Kuja-Halkola R, Rück C, D'Onofrio BM, Jernberg T, Almqvist C, et al.  
599 Association of resting heart rate and blood pressure in late adolescence with subsequent mental  
600 disorders: a longitudinal population study of more than 1 million men in Sweden. *JAMA Psychiatry*.  
601 2016;73(12):1268-75.
- 602 46. Thayer JF, Friedman BH, Borkovec TD. Autonomic characteristics of generalized anxiety  
603 disorder and worry. *Biological Psychiatry*. 1996;39(4):255-66.
- 604 47. Gonçalves R, Rodrigues H, Novaes F, Arbol J, Volchan E, Coutinho ESF, et al. Listening to  
605 the heart: a meta-analysis of cognitive behavior therapy impact on the heart rate of patients with  
606 anxiety disorders. *Journal of Affective Disorders*. 2015;172:231-40.
- 607 48. Garipey G, Nitka D, Schmitz N. The association between obesity and anxiety disorders in the  
608 population: a systematic review and meta-analysis. *International Journal of Obesity*. 2010;34(3):407-  
609 19.
- 610 49. Barry D, Pietrzak RH, Petry NM. Gender differences in associations between body mass  
611 index and DSM-IV mood and anxiety disorders: results from the National Epidemiologic Survey on  
612 Alcohol and Related Conditions. *Annals of Epidemiology*. 2008;18(6):458-66.
- 613 50. Gibson-Smith D, Bot M, Brouwer IA, Visser M, Penninx BW. Diet quality in persons with  
614 and without depressive and anxiety disorders. *Journal of Psychiatric Research*. 2018;106:1-7.
- 615 51. McCaffery JM, Niaura R, Todaro JF, Swan GE, Carmelli D. Depressive symptoms and  
616 metabolic risk in adult male twins enrolled in the National Heart, Lung, and Blood Institute twin  
617 study. *Psychosomatic Medicine*. 2003;65(3):490-7.
- 618 52. Skilton MR, Moulin P, Terra J-L, Bonnet F. Associations between anxiety, depression, and  
619 the metabolic syndrome. *Biological Psychiatry*. 2007;62(11):1251-7.
- 620 53. Herva A, Räsänen P, Miettunen J, Timonen M, Läksy K, Veijola J, et al. Co-occurrence of  
621 metabolic syndrome with depression and anxiety in young adults: the Northern Finland 1966 Birth  
622 Cohort Study. *Psychosomatic Medicine*. 2006;68(2):213-6.
- 623 54. van Milligen BA, Lamers F, Guus T, Smit JH, Penninx BW. Objective physical functioning  
624 in patients with depressive and/or anxiety disorders. *Journal of Affective Disorders*. 2011;131(1-  
625 3):193-9.
- 626 55. Williams LJ, Pasco JA, Jacka FN, Hodge JM, Kotowicz MA, Berk M. Quantitative Heel  
627 Ultrasound (QUS) measures of bone quality in association with mood and anxiety disorders. *Journal  
628 of Affective Disorders*. 2013;146(3):395-400.
- 629 56. Seldenrijk A, van Hout HP, van Marwijk HW, de Groot E, Gort J, Rustemeijer C, et al.  
630 Depression, anxiety, and arterial stiffness. *Biological Psychiatry*. 2011;69(8):795-803.
- 631 57. Yeragani VK, Kumar R, Bar KJ, Chokka P, Tancer M. Exaggerated differences in pulse wave  
632 velocity between left and right sides among patients with anxiety disorders and cardiovascular  
633 disease. *Psychosomatic Medicine*. 2007;69(8):717-22.
- 634 58. Bonnet F, Irving K, Terra J-L, Nony P, Berthezène F, Moulin P. Anxiety and depression are  
635 associated with unhealthy lifestyle in patients at risk of cardiovascular disease. *Atherosclerosis*.  
636 2005;178(2):339-44.
- 637 59. Vogelzangs N, Beekman A, De Jonge P, Penninx B. Anxiety disorders and inflammation in a  
638 large adult cohort. *Translational Psychiatry*. 2013;3(4):e249-e.
- 639 60. Michopoulos V, Powers A, Gillespie CF, Ressler KJ, Jovanovic T. Inflammation in fear-and  
640 anxiety-based disorders: PTSD, GAD, and beyond. *Neuropsychopharmacology*. 2017;42(1):254-70.

- 641 61. Black C, Bot M, Scheffer P, Penninx B. Oxidative stress in major depressive and anxiety  
642 disorders, and the association with antidepressant use; results from a large adult cohort. *Psychological*  
643 *Medicine*. 2017;47(5):936-48.
- 644 62. Beaudreau SA, O'Hara R. Late-life anxiety and cognitive impairment: a review. *The*  
645 *American Journal of Geriatric Psychiatry*. 2008;16(10):790-803.
- 646 63. Davis K, Hotopf M. Mental health phenotyping in UK Biobank. *Progress in Neurology and*  
647 *Psychiatry*. 2019;23(1):4-7.
- 648 64. Glanville KP, Coleman JR, Howard DM, Pain O, Hanscombe KB, Jermy B, et al. Multiple  
649 measures of depression to enhance validity of Major Depressive Disorder in the UK Biobank.  
650 *BJPsych Open*. 2021;7(2):e44.
- 651 65. Bandelow B, Michaelis S. Epidemiology of anxiety disorders in the 21st century. *Dialogues*  
652 *Clin Neurosci*. 2015;17(3):327-35.
- 653 66. Fry A, Littlejohns TJ, Sudlow C, Doherty N, Adamska L, Sprosen T, et al. Comparison of  
654 sociodemographic and health-related characteristics of UK Biobank participants with those of the  
655 general population. *American Journal of Epidemiology*. 2017;186(9):1026-34.  
656
